# Supplementary material for: Modulation of Neuroimmune and Epithelial Dysregulation in Patients With Moderate to Severe Prurigo Nodularis Treated With Nemolizumab
Source: PubMed Central journal article supplement (PMC10413221; doi:10.1001/jamadermatol.2023.2609), 2023-08-09
Supplement: jamadermatol-e232609-s001.pdf [file jamadermatol-e232609-s001.pdf]

## Supplementary Online Content

Deng J, Liao V, Parthasarathy V, et al. Modulation of neuroimmune and epithelial dysregulation in patients with moderate-to-severe prurigo nodularis treated with nemolizumab. *JAMA Dermatol*. Published online August 9, 2023. doi:10.1001/jamadermatol.2023.2609

**eFigure 1.** Study Schematic

**eFigure 2.** Heat Map of Mean-Centered and Scaled Protein Abundances for the Upregulated and Downregulated Differentially Expressed Proteins

**eFigure 3.** Principal Component Analysis Plot of Protein Abundances by Treatment Type and Class

**eFigure 4.** Upstream Regulators in the Nemolizumab Group vs the Placebo Group

**eTable.** Differentially Expressed Proteins in Nemolizumab Responder vs Placebo Nonresponder Groups

This supplementary material has been provided by the authors to give readers additional information about their work.

**eFigure 1.** Study Schematic

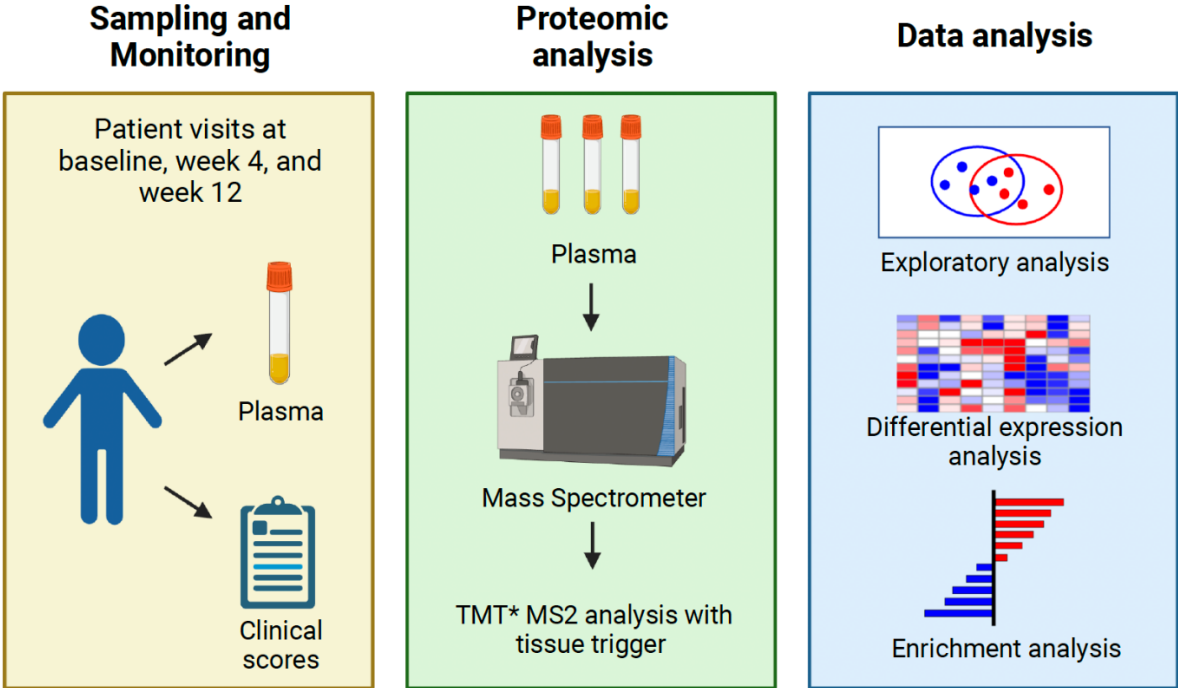

**Figure 2.** Heat Map of Mean-Centered and Scaled Protein Abundances for the Upregulated and Downregulated Differentially Expressed Proteins

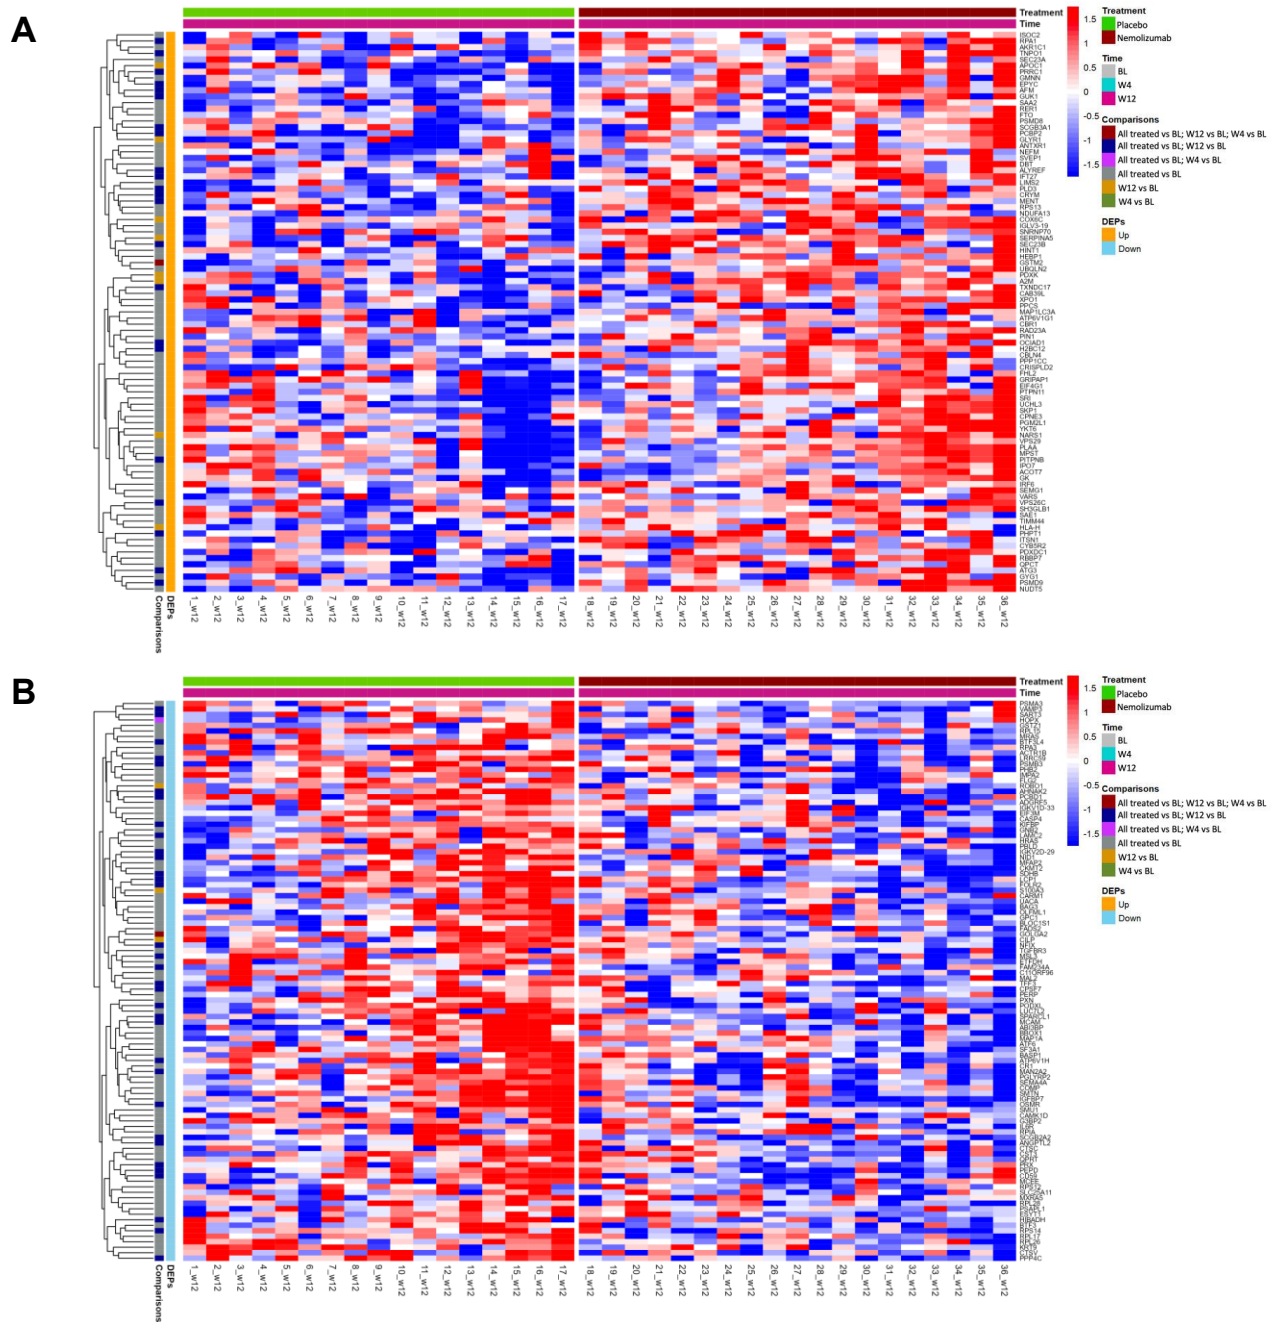

(a) upregulated and (b) downregulated differentially expressed proteins for each individual patient from the nemolizumab responder and placebo non-responder groups at week 12, with correction for the abundances at baseline. Proteins and samples are ordered by hierarchical clustering using Euclidian distances. Red colors represent higher abundance values while blue colors represent lower abundance values.

**eFigure 3.** Principal Component Analysis Plot of Protein Abundances by Treatment Type and Class

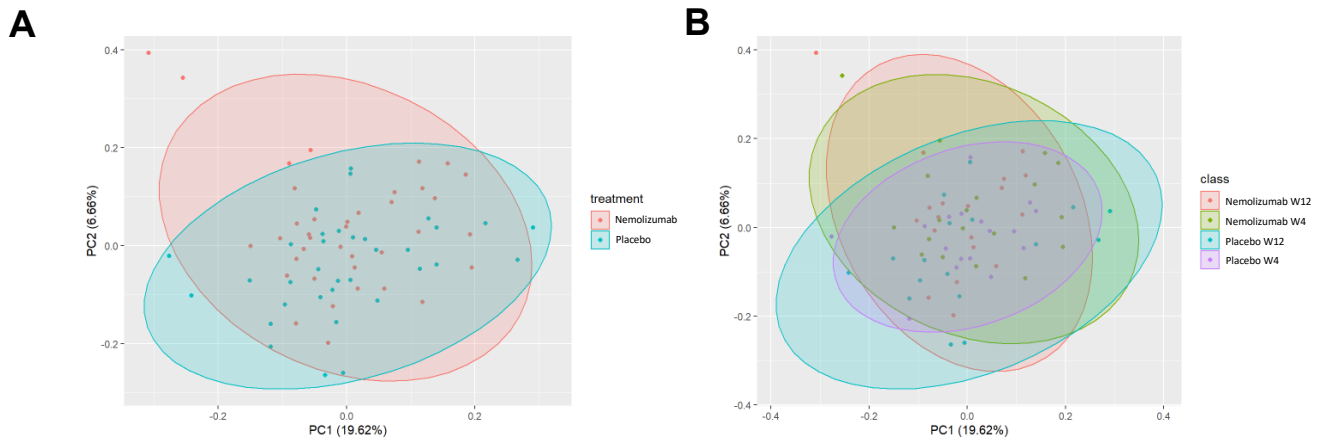

(a) Principal component analysis (PCA) plot of protein abundances by treatment type. (b) PCA plot of protein abundances by class (treatment + time point). Each dot in the PCA plots represents a different sample and each color represents different sample annotations. PC1 and PC2 axis labels indicate the % of variance explained by each one of these components, respectively.

**eFigure 4.** Upstream Regulators in the Nemolizumab Group vs the Placebo Group

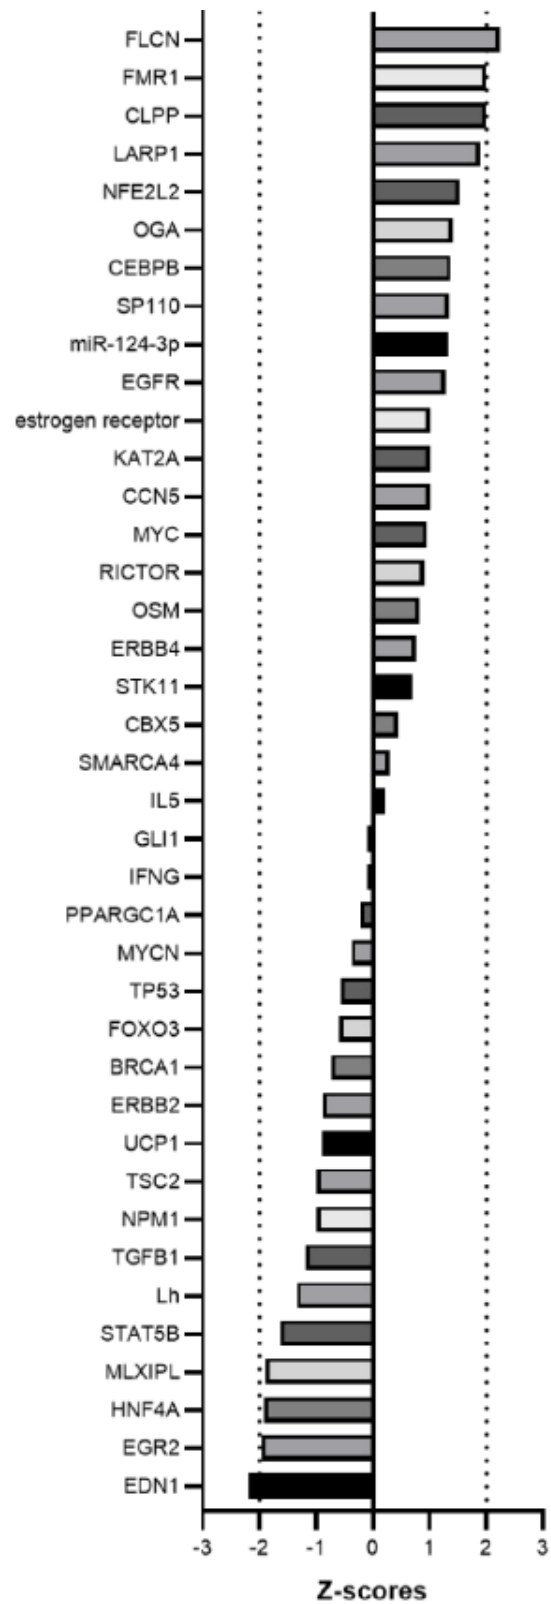

**eTable.** Differentially Expressed Proteins in Nemolizumab Responder vs Placebo Nonresponder Groups

| <b>Gene Name</b> | <b>Log<sub>2</sub>(fold change)</b> | <b>P-value</b> | <b>Adjusted P-value</b> |
|------------------|-------------------------------------|----------------|-------------------------|
| <b>IGKV2D-29</b> | -0.504                              | 0.000047       | 0.006                   |
| <b>ACOT7</b>     | 0.232                               | 0.003          | 0.049                   |
| <b>PSMD9</b>     | 0.399                               | 0.00000038     | 0.00026                 |
| <b>PODXL</b>     | -0.22                               | 0.00003        | 0.012                   |
| <b>PDXK</b>      | 0.381                               | 0.00065        | 0.039                   |
| <b>IMPA2</b>     | -0.298                              | 0.00081        | 0.044                   |
| <b>MRAS</b>      | -0.292                              | 0.002          | 0.047                   |
| <b>IRF6</b>      | 0.27                                | 0.001          | 0.032                   |
| <b>VPS26C</b>    | 0.468                               | 0.000026       | 0.005                   |
| <b>XPO1</b>      | 0.193                               | 0.000037       | 0.005                   |
| <b>RER1</b>      | 0.223                               | 0.001          | 0.032                   |
| <b>YKT6</b>      | 0.291                               | 0.002          | 0.044                   |
| <b>TIMM44</b>    | 0.454                               | 0.0005         | 0.021                   |
| <b>GSTZ1</b>     | -0.331                              | 0.001          | 0.032                   |
| <b>NARS1</b>     | 0.673                               | 0.00069        | 0.04                    |
| <b>H2BC12</b>    | 0.387                               | 0.0000052      | 0.003                   |
| <b>CTSV</b>      | -0.363                              | 0.00036        | 0.03                    |
| <b>CPNE3</b>     | 0.174                               | 0.002          | 0.038                   |
| <b>CILP</b>      | -0.184                              | 0.00052        | 0.037                   |
| <b>ATP6V1G1</b>  | 0.358                               | 0.00094        | 0.03                    |
| <b>GMNN</b>      | 0.416                               | 0.00054        | 0.037                   |
| <b>BBOX1</b>     | -0.222                              | 0.002          | 0.045                   |

|                  |        |          |          |
|------------------|--------|----------|----------|
| <b>IPO7</b>      | 0.366  | 0.001    | 0.032    |
| <b>BAG3</b>      | -0.183 | 0.001    | 0.032    |
| <b>FADS2</b>     | -0.167 | 0.002    | 0.048    |
| <b>A2M</b>       | 0.402  | 0.00094  | 0.048    |
| <b>CST3</b>      | -0.132 | 0.001    | 0.032    |
| <b>HRAS</b>      | -0.426 | 0.00031  | 0.018    |
| <b>IGKV1D-33</b> | -0.458 | 0.001    | 0.032    |
| <b>IGLV3-19</b>  | 0.837  | 0.00084  | 0.028    |
| <b>HLA-H</b>     | 0.284  | 0.00065  | 0.039    |
| <b>APOC1</b>     | 0.688  | 0.00032  | 0.031    |
| <b>SEMG1</b>     | 0.461  | 0.002    | 0.038    |
| <b>SERPINA5</b>  | 0.436  | 0.00025  | 0.027    |
| <b>NEFM</b>      | 0.208  | 0.00028  | 0.017    |
| <b>SNRNP70</b>   | 0.123  | 0.002    | 0.047    |
| <b>IL6R</b>      | -0.231 | 0.001    | 0.034    |
| <b>COX6C</b>     | 0.284  | 0.00058  | 0.039    |
| <b>SAA2</b>      | 0.34   | 0.003    | 0.05     |
| <b>DBT</b>       | 0.194  | 0.001    | 0.033    |
| <b>PEPD</b>      | -0.226 | 0.000031 | 0.005    |
| <b>LCP1</b>      | -0.236 | 5.2E-08  | 0.000046 |
| <b>CD59</b>      | -0.292 | 0.000011 | 0.003    |
| <b>FOLR2</b>     | -0.243 | 0.00016  | 0.012    |
| <b>NID1</b>      | -0.145 | 0.00024  | 0.016    |
| <b>UCHL3</b>     | 0.235  | 0.002    | 0.048    |

|               |        |           |          |
|---------------|--------|-----------|----------|
| <b>CBR1</b>   | 0.134  | 0.00017   | 0.013    |
| <b>CKMT2</b>  | -0.5   | 0.002     | 0.039    |
| <b>CR1</b>    | -0.307 | 0.00051   | 0.021    |
| <b>RPL17</b>  | -0.183 | 0.00012   | 0.011    |
| <b>ATF6</b>   | -0.24  | 0.00008   | 0.018    |
| <b>BTF3</b>   | -0.414 | 0.00016   | 0.012    |
| <b>SDHB</b>   | -0.168 | 0.0000064 | 0.003    |
| <b>MPST</b>   | 0.249  | 0.0009    | 0.044    |
| <b>RPS12</b>  | -0.191 | 0.000033  | 0.005    |
| <b>PSMA3</b>  | -0.131 | 0.001     | 0.037    |
| <b>VAR5</b>   | 0.135  | 0.00045   | 0.02     |
| <b>RPA1</b>   | 0.278  | 0.000035  | 0.005    |
| <b>GSTM2</b>  | 0.27   | 4.6E-08   | 0.000046 |
| <b>PBLD</b>   | -0.274 | 0.00094   | 0.03     |
| <b>SRI</b>    | 0.178  | 0.00028   | 0.017    |
| <b>HIBADH</b> | -0.266 | 0.000072  | 0.008    |
| <b>GK</b>     | 0.277  | 0.00096   | 0.045    |
| <b>S100A3</b> | -0.33  | 0.00075   | 0.042    |
| <b>GPC1</b>   | -0.345 | 0.002     | 0.039    |
| <b>RPA3</b>   | -0.251 | 0.00067   | 0.026    |
| <b>KRT9</b>   | -0.796 | 0.00075   | 0.027    |
| <b>PPP1CC</b> | 0.875  | 0.00011   | 0.023    |
| <b>ACTR1B</b> | -0.487 | 0.001     | 0.034    |
| <b>MCAM</b>   | -0.145 | 0.00034   | 0.019    |



|               |        |           |       |
|---------------|--------|-----------|-------|
| <b>AFM</b>    | 0.285  | 0.000058  | 0.012 |
| <b>RPL28</b>  | -0.205 | 0.00037   | 0.019 |
| <b>GYG1</b>   | 0.273  | 0.00038   | 0.019 |
| <b>PSMD8</b>  | 0.384  | 0.00035   | 0.019 |
| <b>PITPNB</b> | 0.339  | 0.00002   | 0.004 |
| <b>PXN</b>    | -0.458 | 0.00026   | 0.017 |
| <b>RPIA</b>   | -0.24  | 0.001     | 0.033 |
| <b>MAN2A2</b> | -0.273 | 0.0000067 | 0.003 |
| <b>CASP4</b>  | -0.288 | 0.00015   | 0.012 |
| <b>PSMB3</b>  | -0.236 | 0.00014   | 0.018 |
| <b>COMP</b>   | -0.194 | 0.00067   | 0.026 |
| <b>HINT1</b>  | 0.171  | 0.002     | 0.044 |
| <b>CTSC</b>   | -0.13  | 0.002     | 0.048 |
| <b>SMTN</b>   | -0.355 | 0.00058   | 0.023 |
| <b>RAD23A</b> | 0.168  | 0.002     | 0.044 |
| <b>MFAP2</b>  | -0.299 | 0.00083   | 0.028 |
| <b>PPP4C</b>  | -0.344 | 0.000012  | 0.003 |
| <b>RPL26</b>  | -0.632 | 0.00009   | 0.009 |
| <b>RPL15</b>  | -0.194 | 0.002     | 0.046 |
| <b>PCBD1</b>  | -0.248 | 0.00031   | 0.018 |
| <b>RPS14</b>  | -0.416 | 0.00036   | 0.031 |
| <b>RPS13</b>  | 0.136  | 0.00044   | 0.02  |
| <b>GNB2</b>   | -0.343 | 0.00056   | 0.023 |
| <b>SKP1</b>   | 0.295  | 0.002     | 0.047 |

|                 |        |          |          |
|-----------------|--------|----------|----------|
| <b>BLOC1S1</b>  | -0.287 | 0.002    | 0.039    |
| <b>MAP1A</b>    | -0.208 | 0.00077  | 0.027    |
| <b>BASP1</b>    | -0.211 | 0.001    | 0.032    |
| <b>SLC25A11</b> | -0.205 | 0.00025  | 0.03     |
| <b>TGFBR3</b>   | -0.184 | 0.002    | 0.046    |
| <b>EIF4G1</b>   | 0.147  | 0.001    | 0.036    |
| <b>AKR1C1</b>   | 0.432  | 0.001    | 0.033    |
| <b>PTPN11</b>   | 0.255  | 0.002    | 0.046    |
| <b>TFF3</b>     | -0.33  | 0.00005  | 0.006    |
| <b>GOLGA2</b>   | -0.474 | 3.2E-09  | 0.000011 |
| <b>SCGB2A2</b>  | -0.466 | 0.000014 | 0.003    |
| <b>PIN1</b>     | 0.265  | 0.00038  | 0.019    |
| <b>LAMC2</b>    | -0.231 | 0.00069  | 0.026    |
| <b>FHL2</b>     | 0.271  | 0.002    | 0.044    |
| <b>SPARCL1</b>  | -0.169 | 0.000066 | 0.007    |
| <b>CRYM</b>     | 0.303  | 0.00056  | 0.023    |
| <b>NFIX</b>     | -0.328 | 0.00025  | 0.016    |
| <b>SART3</b>    | -0.181 | 0.00072  | 0.026    |
| <b>QPRT</b>     | -0.422 | 0.0001   | 0.01     |
| <b>PCBP2</b>    | 0.488  | 0.00011  | 0.016    |
| <b>SEC23A</b>   | 0.158  | 0.002    | 0.047    |
| <b>SEC23B</b>   | 0.343  | 0.00013  | 0.011    |
| <b>SF3A1</b>    | -0.215 | 0.00044  | 0.02     |
| <b>ITSN1</b>    | 0.342  | 0.0006   | 0.038    |

|                 |        |          |          |
|-----------------|--------|----------|----------|
| <b>VAMP3</b>    | -0.618 | 5.3E-08  | 0.000046 |
| <b>ETFDH</b>    | -0.297 | 0.00082  | 0.044    |
| <b>IGFBP7</b>   | -0.167 | 0.00061  | 0.024    |
| <b>RBBP7</b>    | 0.421  | 0.002    | 0.044    |
| <b>QPCT</b>     | 0.438  | 0.00058  | 0.023    |
| <b>GUK1</b>     | 0.292  | 0.000047 | 0.006    |
| <b>SMU1</b>     | -0.293 | 0.0004   | 0.019    |
| <b>GLYR1</b>    | 0.569  | 0.000072 | 0.012    |
| <b>SVEP1</b>    | 0.367  | 0.00012  | 0.011    |
| <b>GRIPAP1</b>  | 0.613  | 0.001    | 0.034    |
| <b>FLG2</b>     | -0.158 | 0.00034  | 0.019    |
| <b>CYB5R2</b>   | 0.207  | 0.000064 | 0.007    |
| <b>PSAPL1</b>   | -0.188 | 0.002    | 0.044    |
| <b>PDXDC1</b>   | 0.389  | 0.00069  | 0.026    |
| <b>PGM2L1</b>   | 0.392  | 0.001    | 0.032    |
| <b>OLFML1</b>   | -0.171 | 0.00017  | 0.013    |
| <b>EIF3M</b>    | -0.259 | 0.002    | 0.044    |
| <b>LIMS2</b>    | 0.423  | 0.000031 | 0.005    |
| <b>ABI3BP</b>   | -0.127 | 0.002    | 0.044    |
| <b>C11ORF96</b> | -0.446 | 0.003    | 0.05     |
| <b>ALYREF</b>   | 0.47   | 0.00022  | 0.015    |
| <b>CARM1</b>    | -0.265 | 0.002    | 0.044    |
| <b>CAMK1D</b>   | -0.443 | 0.00012  | 0.011    |
| <b>PLD3</b>     | 0.193  | 0.00034  | 0.019    |

|                |        |            |         |
|----------------|--------|------------|---------|
| <b>AHNAK2</b>  | -0.101 | 0.00013    | 0.011   |
| <b>ADGRF5</b>  | -0.13  | 0.002      | 0.039   |
| <b>MSL3</b>    | -0.291 | 0.00015    | 0.012   |
| <b>CPSF7</b>   | -0.287 | 0.0007     | 0.026   |
| <b>TNPO1</b>   | 0.309  | 0.000023   | 0.004   |
| <b>MAL2</b>    | -0.293 | 0.00099    | 0.031   |
| <b>ISOC2</b>   | 0.406  | 0.001      | 0.034   |
| <b>LRRC59</b>  | -0.166 | 0.001      | 0.034   |
| <b>KIFBP</b>   | -0.186 | 0.00039    | 0.019   |
| <b>PERP</b>    | -0.375 | 0.00038    | 0.019   |
| <b>BTF3L4</b>  | -0.645 | 0.0000055  | 0.016   |
| <b>PRRC1</b>   | 0.48   | 0.00006    | 0.012   |
| <b>PGLYRP2</b> | -0.104 | 0.002      | 0.041   |
| <b>MCEE</b>    | -0.303 | 0.00082    | 0.028   |
| <b>SCGB3A1</b> | 0.577  | 0.00034    | 0.031   |
| <b>PHB2</b>    | -0.132 | 0.002      | 0.044   |
| <b>EPYC</b>    | 0.688  | 0.000029   | 0.005   |
| <b>OSMR</b>    | -0.203 | 0.00036    | 0.019   |
| <b>HOPX</b>    | -0.942 | 0.00000035 | 0.00062 |
| <b>TXNDC17</b> | 0.307  | 0.0000068  | 0.003   |
| <b>ESYT1</b>   | -0.203 | 0.001      | 0.032   |
| <b>MENT</b>    | 0.331  | 0.00017    | 0.013   |
| <b>IFT27</b>   | 0.368  | 0.0002     | 0.014   |
| <b>PRX</b>     | -0.28  | 0.00062    | 0.024   |

|                 |        |           |       |
|-----------------|--------|-----------|-------|
| <b>UACA</b>     | -0.393 | 0.003     | 0.049 |
| <b>FTO</b>      | 0.204  | 0.00071   | 0.026 |
| <b>CRISPLD2</b> | 0.335  | 0.00045   | 0.02  |
| <b>FAM234A</b>  | -0.737 | 0.000009  | 0.003 |
| <b>SEMA4A</b>   | -0.192 | 0.001     | 0.032 |
| <b>MAP1LC3A</b> | 0.304  | 0.001     | 0.032 |
| <b>ANTXR1</b>   | 0.35   | 0.000099  | 0.01  |
| <b>CAB39L</b>   | 0.366  | 0.00032   | 0.03  |
| <b>PPCS</b>     | 0.202  | 0.002     | 0.044 |
| <b>MXRA5</b>    | -0.186 | 0.001     | 0.036 |
| <b>HEBP1</b>    | 0.23   | 0.00082   | 0.028 |
| <b>PHPT1</b>    | 0.318  | 0.0000078 | 0.003 |
| <b>ATG3</b>     | 0.543  | 0.000031  | 0.005 |
| <b>CBLN4</b>    | 0.243  | 0.002     | 0.044 |
| <b>OCIAD1</b>   | 0.53   | 0.001     | 0.033 |
| <b>NDUFA13</b>  | 0.448  | 0.000019  | 0.004 |
| <b>SAE1</b>     | 0.176  | 0.002     | 0.044 |
| <b>VPS29</b>    | 0.218  | 0.002     | 0.047 |
| <b>UBQLN2</b>   | 0.379  | 0.002     | 0.039 |
| <b>ATP6V1H</b>  | -0.353 | 0.000047  | 0.012 |
| <b>NUDT5</b>    | 0.171  | 0.000082  | 0.009 |
| <b>ANGPTL2</b>  | -0.413 | 0.000074  | 0.012 |
| <b>G3BP2</b>    | -0.66  | 0.00048   | 0.021 |
| <b>PLAA</b>     | 0.331  | 0.00075   | 0.027 |

|                |        |         |       |
|----------------|--------|---------|-------|
| <b>SH3GLB1</b> | 0.35   | 0.00036 | 0.019 |
| <b>LUC7L2</b>  | -0.468 | 0.0005  | 0.021 |
| <b>ROBO1</b>   | -0.256 | 0.00047 | 0.036 |
