# Supplementary material for: Modulation of Neuroimmune and Epithelial Dysregulation in Patients With Moderate to Severe Prurigo Nodularis Treated With Nemolizumab
Source: PubMed Central journal article supplement (PMC10413221; doi:10.1001/jamadermatol.2023.2609), 2023-08-09
Supplement: jamadermatol-e232609-s002.pdf [file jamadermatol-e232609-s002.pdf]

## Data Sharing Statement

Deng. Modulation of Neuroimmune and Epithelial Dysregulation in Patients With Moderate to Severe Prurigo Nodularis Treated With Nemolizumab. *JAMA Dermatol.* Published August 09, 2023. doi:10.1001/jamadermatol.2023.2609

### Data

**Data available:** No
